# Supplementary material
Source: HighWire-hosted journal article supplement (https://gh.bmj.com/content/7/8/e008564)
Supplement: inline-supplementary-material-3 [file inline-supplementary-material-3.pdf]

## The quality of veterinary medicines and their implications for One Health

### Supplemental material 3. Types of studies included in the review and definition

|                                                                                                         | <b>Study/report type</b>                  | <b>Definition</b>                                                                                                                                                                                                                                                  |
|---------------------------------------------------------------------------------------------------------|-------------------------------------------|--------------------------------------------------------------------------------------------------------------------------------------------------------------------------------------------------------------------------------------------------------------------|
| <b>Scientific reports</b>                                                                               | Quality control                           | Study in which samples were collected to be analyzed in routine post marketing surveillance by a MRA or a laboratory mandated by a MRA                                                                                                                             |
|                                                                                                         | Prevalence survey                         | Study in which samples were collected within the pharmaceutical supply chain to assess their quality, in order to describe the prevalence of circulating SF medicines                                                                                              |
|                                                                                                         | Equivalence study                         | Study to assess the quality of different marketed brands of the same API(s) assuming that the results of the collected samples would represent the quality of the brand as a whole and not an estimate of the frequency of individual samples of different quality |
|                                                                                                         | Analysis technique development/validation | Study in which samples are assembled in a laboratory to answer a chemical, rather than an epidemiological question (mostly for the development of a new quality technique)                                                                                         |
|                                                                                                         | Stability study                           | Study in which quality test is performed on medicines subjected to various storage conditions                                                                                                                                                                      |
|                                                                                                         | Bioavailability study                     | Study of the in vivo bioavailability, i.e. testing for adequate body tissue concentration including the rate and extent to which drug reaches the body tissue compartment                                                                                          |
| <b>Other reports</b>                                                                                    | Recall/warning/alert                      | Recall/Warning/Alert of products by manufacturers via MRA or by MRAs directly, or by WHO rapid alert                                                                                                                                                               |
|                                                                                                         | Case reports                              | Patients not responding to medicines or adverse drug reaction where the quality of the medicine was suspected as the cause. Also includes samples analyzed for quality not included in a scientific study.                                                         |
|                                                                                                         | Seizure                                   | Confiscations by police or MRA                                                                                                                                                                                                                                     |
| API, Active Pharmaceutical Ingredient; MRA, Medicines Regulatory Agency; WHO, World Health Organization |                                           |                                                                                                                                                                                                                                                                    |
