# Supplementary material
Source: HighWire-hosted journal article supplement (https://gh.bmj.com/content/7/8/e008564)
Supplement: inline-supplementary-material-5 [file inline-supplementary-material-5.pdf]

## The quality of veterinary medicines and their implications for One Health

**Supplemental material 5. Number of publication, data points and samples per study/report type in publications (either scientific studies or other reports) containing description of the quality of veterinary medicines in data point(s), i.e. in a specific location at a specific time**

|                           | Study type                                | No. publications<br>n (%) | No. data points<br>n (%) | No samples<br>n (%) |
|---------------------------|-------------------------------------------|---------------------------|--------------------------|---------------------|
| <b>Scientific reports</b> | Analysis technique development/validation | 24 (12.1%)                | 36 (6.6%)                | 79 (0.2%)           |
|                           | Prevalence survey                         | 20 (10.1%)                | 173 (31.9%)              | 1,246 (3.5%)        |
|                           | Quality control                           | 16 (8.1%)                 | 91 (16.8%)               | 34,202 (95.7%)      |
|                           | Equivalence study                         | 11 (5.6%)                 | 28 (5.2%)                | 188 (0.5%)          |
|                           | Stability study                           | 2 (1.0%)                  | 3 (0.6%)                 | 14 (0.0%)           |
|                           | Others                                    | 2 (1.0%)                  | 4 (0.7%)                 |                     |
|                           | <b>Total</b>                              | <b>75 (37.9%)</b>         | <b>335 (61.7%)</b>       | <b>35,729</b>       |
| <b>Other reports</b>      | Recall/warning/alert                      | 73 (36.9%)                | 121 (22.3%)              |                     |
|                           | Seizure                                   | 48 (24.2%)                | 85 (15.7%)               |                     |
|                           | Case reports                              | 2 (1.0%)                  | 2 (0.4%)                 | 4                   |
|                           | <b>Total</b>                              | <b>123 (62.1%)</b>        | <b>208 (38.3%)</b>       |                     |
| <b>Total</b>              |                                           | <b>198 (100.0%)</b>       | <b>543 (100.0%)</b>      | <b>35,733</b>       |
