# Supplementary material
Source: HighWire-hosted journal article supplement (https://gh.bmj.com/content/7/8/e008564)
Supplement: inline-supplementary-material-7 [file inline-supplementary-material-7.pdf]

## The quality of veterinary medicines and their implications for One Health

### Supplemental material 7. Failure frequency per type of quality test performed in prevalence survey

| Quality attribute test                                                                                                                                             | Failure frequency %<br>(n/N) |
|--------------------------------------------------------------------------------------------------------------------------------------------------------------------|------------------------------|
| API content                                                                                                                                                        | 46.6% (481/1,032)            |
| Disintegration                                                                                                                                                     | 23.1% (31/134)               |
| Package/label/physical appearance inspection                                                                                                                       | 1.1% (8/718)                 |
| Impurities/Contaminants/Related substances                                                                                                                         | 0.0% (0/27)                  |
| Sterility                                                                                                                                                          | 0.0% (0/120)                 |
| Uniformity of units*                                                                                                                                               | 29.3% (54/181)               |
| Other chemical analysis**                                                                                                                                          | 11.0% (145/1,322)            |
| Unknown/not detailed***                                                                                                                                            | 49.5% (105/212)              |
| *Includes content uniformity, weight/mass uniformity, uniformity of mass, and weight variation.                                                                    |                              |
| **Includes identification of APIs, pH measurement, and screening (right/wrong API) using Ultra High Performance Liquid Chromatography Mass Spectrometry (UPLC-MS). |                              |
| ***Different quality tests were stated to be performed but results not broken down by test.                                                                        |                              |
| <i>Note: One sample may have been tested for one or more quality tests.</i>                                                                                        |                              |
