# Supplementary material
Source: HighWire-hosted journal article supplement (https://gh.bmj.com/content/7/8/e008564)
Supplement: inline-supplementary-material-9 [file inline-supplementary-material-9.pdf]

## The quality of veterinary medicines and their implications for One Health

### Supplemental material 9. Failure frequency of samples collected in prevalence surveys per type of outlet

| Type of outlet                                                     | Failure frequency % (n/N) |
|--------------------------------------------------------------------|---------------------------|
| Manufacturer                                                       | 100.0% (1/1)              |
| Chemical shops*                                                    | 80.2% (105/131)           |
| Online pharmacy                                                    | 80.0% (4/5)               |
| Farm*                                                              | 75.0% (3/4)               |
| Veterinary clinics/hospitals/health centres                        | 60.0% (18/30)             |
| Veterinary medicines outlets                                       | 58.9% (43/73)             |
| Combination of outlets                                             | 57.0% (298/523)           |
| Unregistered/unlicensed outlets/facilities                         | 45.9% (90/196)            |
| Wholesalers/importer/distributors                                  | 43.8% (56/128)            |
| Unknown                                                            | 19.4% (30/155)            |
| <b>Total</b>                                                       | <b>52.0% (648/1,246)</b>  |
| <i>Note:</i>                                                       |                           |
| <i>*The author did not clarified the definition of outlet type</i> |                           |
