# Supplementary material
Source: HighWire-hosted journal article supplement (https://gh.bmj.com/content/7/8/e008564)
Supplement: inline-supplementary-material-10 [file inline-supplementary-material-10.pdf]

## The quality of veterinary medicines and their implications for One Health

### Supplemental material 10. Failure frequencies of samples collected in prevalence surveys by region of stated manufacturer

| <b>Continent</b> | <b>Failure frequency % (n/N)</b> |
|------------------|----------------------------------|
| America          | 77.8% (14/18)                    |
| Asia             | 76.0% (139/183)                  |
| Africa           | 66.7% (4/6)                      |
| Europe           | 64.4% (67/104)                   |
| Unknown          | 45.3% (424/935)                  |
| <b>Total</b>     | <b>52.0% (648/1,246)</b>         |
