# Supplementary material
Source: HighWire-hosted journal article supplement (https://gh.bmj.com/content/7/8/e008564)
Supplement: inline-supplementary-material-13 [file inline-supplementary-material-13.pdf]

## The quality of veterinary medicines and their implications for One Health

### Supplemental material 13. Detailed results for the equivalence studies (n= 11) of veterinary medicines

In 11 equivalence studies, most of samples were tested for more than one quality attribute (85.1%, n= 160). All 188 samples were tested for API identification and API content, 118 samples (62.8%) for impurities/contaminant and 108 samples (57.4%) for dissolution test. Packaging analysis was conducted for 13.9% (n= 26) of 188 samples.

The failure frequency due to API content test failure (43.1%, 81/188) was the highest, followed by other physical tests (42.6%, 46/108) and dissolution test failure (23.1%, 25/108). In one study, out of 96 samples tested for API content, dissolution and impurities, there were no breakdown of the results by test for 60 (31.9%) samples.[1] None of the 26 samples tested for packaging inspection failed.

Of 81 samples that failed API content test, 49.4% (n= 40) contained lower API amount than stated on the packaging and 6.2% (n= 5) higher API. For 44.4% (n= 36) of the samples there was not enough details in the publication as to whether they contained higher or lower amounts of API.

| Failure frequency by quality test in equivalence studies                                                                            |                           |
|-------------------------------------------------------------------------------------------------------------------------------------|---------------------------|
| Quality test                                                                                                                        | Failure frequency % (n/N) |
| API content                                                                                                                         | 43.1% (81/188)            |
| Package/label/physical appearance inspection                                                                                        | 32.5% (13/40)             |
| Dissolution                                                                                                                         | 23.1% (25/108)            |
| Impurities/contaminants/related substances                                                                                          | 1.0% (1/96)               |
| Uniformity of units*                                                                                                                | 57.9 (11/19)              |
| Other physical analysis**                                                                                                           | 29.3% (12/41)             |
| Other chemical analysis***                                                                                                          | 8.0% (18/224)             |
| Other techniques****                                                                                                                | 0.1% (3/38)               |
| * Includes content uniformity, weight/mass uniformity, uniformity of mass, and weight variation.                                    |                           |
| **Includes crystal size, disintegration, friability, hardness.                                                                      |                           |
| ***Includes API identification, pH and zinc content.                                                                                |                           |
| ****Includes bacterial susceptibility, infectious agents contamination, insulin concentrations in the supernatant and pyrogenicity. |                           |
| <i>Note: One sample may have been tested for one or more quality tests</i>                                                          |                           |

| Failure frequency by version of drugs in equivalence studies |                           |
|--------------------------------------------------------------|---------------------------|
| Version of drug                                              | Failure frequency % (n/N) |
| Compounded                                                   | 50.4% (63/125)            |
| <b>Generic</b>                                               | <b>12.5% (1/8)</b>        |
| <b>Unknown</b>                                               | <b>67.3% (37/55)</b>      |

**The quality of veterinary medicines and their implications for One Health**

|              |                        |
|--------------|------------------------|
| <b>Total</b> | <b>53.7% (101/188)</b> |
|--------------|------------------------|

## Reference:

- 1 Farah C, D'Aoust PM, Krantis A, et al. Analysis of ciprofloxacin in fish antibiotic products available from the Internet. *PeerJ Prepr* 2016;4:e1856v1. doi:10.7287/peerj.preprints.1856v1
